# Supplementary material for: Variability between human experts and artificial intelligence in identification of anatomical structures by ultrasound in regional anaesthesia: a framework for evaluation of assistive artificial intelligence
Source: PubMed Central journal article supplement (PMC11103080; doi:10.1016/j.bja.2023.09.023), 2023-10-27
Supplement: mmc1.pdf [file mmc1.pdf]

**Variability between human experts and artificial intelligence for identification of anatomical structures on ultrasound in regional anaesthesia: a framework evaluation of assistive artificial intelligence**

**Supplementary material**

**Authors**

James S Bowness<sup>1,2</sup>, Robert Morse<sup>3</sup>, Owen Lewis<sup>2</sup>, James Lloyd<sup>2</sup>, David Burckett-St Laurent<sup>4</sup>, Boyne Bellew<sup>5,6</sup>, Alan JR Macfarlane<sup>7,8</sup>, Amit Pawa<sup>9,10</sup>, Alasdair Taylor<sup>11</sup>, J Alison Noble<sup>12</sup>, Helen Higham<sup>1,13</sup>

**Author Institutions**

1. Oxford Simulation, Teaching and Research Centre, University of Oxford, Oxford, UK
2. Department of Anaesthesia, Aneurin Bevan University Health Board, Newport, UK
3. Intelligent Ultrasound, Cardiff, UK
4. Department of Anaesthesia, Royal Cornwall Hospitals NHS Trust, Truro, UK
5. Department of Surgery & Cancer, Imperial College London, London, UK
6. Department of Anaesthesia, Imperial College Healthcare NHS Trust, London, UK
7. Department of Anaesthesia, NHS Greater Glasgow & Clyde, Glasgow, UK
8. School of Medicine, Dentistry & Nursing, University of Glasgow, Glasgow, UK
9. Department of Anaesthesia, Guy's & St Thomas' NHS Foundation Trust, London, UK
10. Faculty of Life Sciences and Medicine, King's College London, London, UK
11. Department of Anaesthesia, NHS Tayside, Dundee, UK
12. Institute for Biomedical Engineering, University of Oxford, Oxford, UK
13. Department of Anaesthesia, Oxford University Hospitals NHS Foundation Trust, Oxford, UK

## Anatomical Structures Identified

**PNB** peripheral nerve block; **ISB** interscalene level brachial plexus block; **AxBP** axillary level brachial plexus block; **ESP** erector spinae plane block; **RSB** rectus sheath block; **ACB** adductor canal block; **SNB** popliteal level sciatic nerve block (\*=enclosed structure annotation, †=line annotation)

| <b>PNB</b>  | <b>*Nerve</b>                                                         | <b>*Artery</b>  | <b>†Fascial/<br/>Serosal Plane</b>                                                    | <b>†Bone</b>       | <b>*Muscle</b>                       |
|-------------|-----------------------------------------------------------------------|-----------------|---------------------------------------------------------------------------------------|--------------------|--------------------------------------|
| <b>ISB</b>  | C5 nerve root<br>C6 nerve root                                        |                 |                                                                                       |                    | Scalenus anterior<br>Scalenus medius |
| <b>AxBP</b> | Musculocutaneous nerve<br>Median nerve<br>Ulnar nerve<br>Radial nerve | Axillary artery | Fascia over conjoint<br>tendon                                                        |                    |                                      |
| <b>ESP</b>  |                                                                       |                 |                                                                                       | Transverse process | Erector spinae<br>muscle group       |
| <b>RSB</b>  |                                                                       |                 | Rectus sheath<br>(anterior layer)<br>Rectus sheath<br>(posterior layer)<br>Peritoneum |                    | Rectus abdominis                     |
| <b>ACB</b>  | Saphenous nerve                                                       | Femoral artery  |                                                                                       |                    | Sartorius                            |
| <b>SNB</b>  | Sciatic nerve                                                         |                 |                                                                                       |                    |                                      |

## Scan Subject Demographic Data

| Model ID | Block | Age | Sex | BMI  |
|----------|-------|-----|-----|------|
| M01      | AX    | 42  | F   | 27.3 |
| M03      | POP   | 56  | M   | 31.6 |
| M04      | RS    | 42  | M   | 24.3 |
| M04      | ADD   | 42  | M   | 24.3 |
| M06      | AX    | 35  | F   | 36   |
| M07      | ESP   | 23  | F   | 38.4 |
| M07      | POP   | 23  | F   | 38.4 |
| M12      | AX    | 31  | F   | 28.7 |
| M12      | ADD   | 31  | F   | 28.7 |
| M12      | ESP   | 31  | F   | 28.7 |
| M13      | POP   | 58  | F   | 25.7 |
| M14      | ESP   | 36  | F   | 32.3 |
| M17      | ADD   | 61  | M   | 28.6 |
| M22      | ESP   | 53  | M   | 30.7 |
| M27      | IS    | 58  | F   | 30.1 |
| M27      | RS    | 58  | F   | 30.1 |
| M29      | ADD   | 47  | M   | 21.6 |
| M30      | IS    | 63  | M   | 24.4 |
| M31      | ESP   | 64  | F   | 21.7 |
| M33      | AX    | 34  | M   | 37.1 |
| M33      | IS    | 34  | M   | 37.1 |
| M33      | POP   | 34  | M   | 37.1 |
| M34      | IS    | 27  | M   | 22.8 |
| M34      | POP   | 27  | M   | 22.8 |
| M36      | RS    | 27  | M   | 34.6 |
| M38      | IS    | 28  | M   | 27.4 |
| M38      | RS    | 28  | M   | 27.4 |
| M39      | RS    | 25  | F   | 19.7 |
| M40      | AX    | 25  | F   | 23.4 |
| M40      | ADD   | 25  | F   | 23.4 |

## Instructions for Annotation

In the following ultrasound images, you will be asked to annotate structures using enclosures and lines.

### Enclosures

- Generally, when using an enclosure, you will draw a closed shape around the perimeter of an object. You should aim to join your line
- The perimeter of some structures may include one or more edges of the ultrasound image. In these cases, you do not need to 'draw' a line along the edge – this will be done automatically.
- Any annotation outside the ultrasound image will be 'clipped'. Therefore, if you believe the structure being annotated extends to the edge of the image, you can extend your annotation outside the image to ensure you have reached the edge
- Artery enclosures should be the perimeter of the lumen
- Nerve enclosures should be the outer perimeter

### Lines

- The line should be drawn over the most prominent (brightest) part of the anatomical structure being annotated (e.g., pleura/peritoneum, fascial layer or bone)
- You should only annotate parts of the structure that can be seen (e.g., if a layer of the rectus sheath is visible on one side of the screen but fades out and the other end can't be seen with certainty, stop your annotation when the structure can no longer be confidently identified)
- Any annotation outside the ultrasound image will be 'clipped'. Therefore, if you believe the structure being annotated extends to the edge of the image, you can extend your annotation outside the image to ensure you have reached the edge.

### Please Note

- The cursor is displaced from the pen tip by a few pixels, so use the cursor to draw (hovering over the screen shows you where the cursor is before you draw)
- The structures you will be asked to annotate for each block, with any specific additional information required, are listed below

## **Interscalene**

### *Enclosures*

- Anterior scalene (annotate the external boundary of the muscle; same for all muscles)
- Middle scalene
- C5 nerve root (annotate the external boundary of the nerve; same for all nerves)
- C6 nerve root

## **Axillary**

### *Enclosures*

- Axillary artery (annotate the lumen of the vessel (not wall); same for all blood vessels)
- Axillary vein
- Median nerve
- Musculocutaneous nerve
- Radial nerve
- Ulnar nerve

### *Lines*

- Conjoint tendon (annotate the fascia overlying the conjoint tendon)

## **Erector Spinae**

### *Enclosures*

- Erector spinae muscle group; annotate the superficial and deep borders of the erector spinae muscle group (the perimeter of this structures may include an edge/s of the ultrasound image - you do not need to continue your line down the edge of the image)

### *Lines*

- Transverse process (annotate the posterior/superficial surface of the transverse process)

## **Rectus Sheath**

### *Enclosures*

- Rectus abdominis (the perimeter of this structure may include an edge/s of the ultrasound image - you do not need to continue your line down the edge of the image)

### *Lines*

- Rectus sheath (anterior layer; annotate the anterior layer of the sheath)
- Rectus sheath (posterior layer; annotate the posterior layer of the sheath)
- Peritoneum (annotate the peritoneum)

## **Adductor Canal**

### *Enclosures*

- Femoral artery
- Sartorius (the perimeter of this structure may include an edge/s of the ultrasound image - you do not need to continue your line down the edge of an image)

- Saphenous nerve/nerve complex

### **Popliteal**

#### *Enclosure*

- Sciatic nerve (as the single structure or the point at which the nerve is dividing, as one overall outline)
